# Supplementary material
Source: publisher figshare collection journal article supplement (https://sage.figshare.com/ndownloader/files/17566370)
Supplement: Supplementary file 1 [file 17566370]

Supplementary Material for

**Repeated Exposure to Exemplars Does Not Enhance Implicit Learning:**

**A Puzzle for Models of Learning and Memory**

Greg J. Neil and Philip A. Higham

**Appendix A – Word Lists**

**Study List 1.**

|           |                |
|-----------|----------------|
| ARM       | ABBREVIATION   |
| BALL      | ALLURE         |
| BAR       | APPLICATOR     |
| BODY      | BELIEVABLE     |
| BRIDGE    | BITTERSWEET    |
| BUILDING  | BOOSTER        |
| CHURCH    | COMMENDATION   |
| EARTH     | DEHUMANIZE     |
| EQUIPMENT | DEPICTION      |
| FACE      | DIABOLICAL     |
| FARM      | DIVIDER        |
| FIRE      | EXHAUSTIBLE    |
| HAIR      | GLORIFICATION  |
| HOTEL     | INDESTRUCTIBLE |
| HUMAN     | INKLING        |
| JACK      | LARVAL         |
| KING      | MELD           |
| LADY      | MEDITATE       |
| LAND      | NAB            |
| MARKET    | OBSCENITY      |
| MOTHER    | PENSIVE        |
| OFFICER   | PRESCRIPTIVE   |
| PAPER     | PUNITIVE       |
| PLANE     | RECREATE       |
| POET      | ROVE           |
| POST      | SARCASM        |
| PRESIDENT | SATIATE        |
| RIVER     | SCATHING       |
| ROAD      | SHAKESPEARIAN  |
| ROSE      | SECLUDE        |
| SHIP      | SULTRY         |
| SPRING    | SYNTHESIZE     |
| STREET    | SUP            |

STUDENT  
SUN  
TEACHER  
TRAIN  
UNIVERSITY  
WINDOW  
WOMAN

THANKLESS  
TIDAL  
TREASONOUS  
UNDERRATE  
UNFLATTERING  
WASTAGE  
UNHOOK

## Study List 2.

|               |           |
|---------------|-----------|
| WRITTEN       | WOMB      |
| UNITED        | WIG       |
| TOWARD        | VEAL      |
| THOUSAND      | UMPIRE    |
| SUPPORT       | TORNADO   |
| STRESS        | THIMBLE   |
| SON           | STOCKING  |
| SOMEONE       | SQUIRREL  |
| SAYING        | SNAIL     |
| PRESS         | SHRUB     |
| POSSIBLE      | SAP       |
| POLICY        | RASPBERRY |
| ORIGINAL      | PROJECTOR |
| MOREOVER      | POLIO     |
| MET           | PICKLE    |
| MEDICAL       | PERCH     |
| MARKED        | PARCEL    |
| LOT           | OATMEAL   |
| JAZZ          | MORPHINE  |
| ITSELF        | MAMMAL    |
| INTERNATIONAL | KITE      |
| INDICATE      | JEWEL     |
| HAVING        | INFIRMARY |
| GIVEN         | HOCKEY    |
| FORWARD       | HELMET    |
| ENERGY        | GROCER    |
| DRIVE         | FLORA     |
| DEMAND        | ENAMEL    |
| COVERED       | DUCHESS   |
| COMPLETE      | DOE       |
| CLOSED        | DIAL      |
| CHOICE        | DANDELION |
| BRITISH       | CLOVE     |
| BETTER        | CARROT    |
| ANYTHING      | CAMEL     |
| ANALYSIS      | BOAR      |
| ALLOWED       | AVALANCHE |
| ACTIVE        | ASPARAGUS |
| ACROSS        | APRICOT   |
| ABOVE         | ACCORDION |

## Test List 1.

BATTLE  
BILL  
BOOK  
CENT  
CHILDREN  
DINNER  
FATHER  
FILM  
GAS  
HALL  
HOME  
HOUSE  
ISLAND  
MACHINE  
MATERIAL  
MONEY  
OFFICE  
ROOM  
SECRETARY  
WATER  
ARTIFICIALITY  
AVERT  
BEMOAN  
CATEGORIZE  
CLOD  
CUSTODIAL  
EFFLORESCE  
EQUINE  
FINIAL  
GRIZZLED  
HOME-BRED  
INFINITIVE  
JUDICIOUS  
NEBULA  
OVERBLOWN  
PARTAKING  
PRAYERFUL  
SHIFTLESS  
STEELY  
UNSAID  
ACTUAL  
APPLIED  
BECOME  
BELIEVE  
CHARGE

BAGPIPE  
BELFRY  
BRACELET  
CLARINET  
EARTHWORM  
EWE  
FOWL  
GIG  
GULLET  
HADDOCK  
HARE  
HORSEHAIR  
ICICLE  
MINER  
MOTH  
MUG  
PENICILLIN  
SKATE  
SLEET  
WAND  
BODY  
BUILDING  
EQUIPMENT  
FACE  
HOTEL  
HUMAN  
LAND  
MARKET  
OFFICER  
PLANE  
PRESIDENT  
ROAD  
ROSE  
SHIP  
SPRING  
STREET  
STUDENT  
TEACHER  
WOMAN  
ABBREVIATION  
APPLICATOR  
BITTERSWEET  
COMMENDATION  
DEHUMANIZE  
DEPICTION

CIVIL  
DESIGNED  
DISTRIBUTION  
DOUBT  
EVERYONE  
FEED  
FRENCH  
LET  
LOOKING  
MOVING  
NATURAL  
PREVIOUS  
SERVE  
SPENT  
THINKING

DIABOLICAL  
DIVIDER  
LARVAL  
PENSIVE  
PRESCRIPTIVE  
PUNITIVE  
RECREATE  
SARCASM  
SATIATE  
SECLUDE  
SULTRY  
TREASONOUS  
UNDERRATE  
UNFLATTERING  
UNHOOK

## Test List 2.

|              |               |
|--------------|---------------|
| ACTUAL       | ARTIFICIALITY |
| APPLIED      | AVERT         |
| BECOME       | BEMOAN        |
| BELIEVE      | CATEGORIZE    |
| CHARGE       | CLOD          |
| CIVIL        | CUSTODIAL     |
| DESIGNED     | EFFLORESCE    |
| DISTRIBUTION | EQUINE        |
| DOUBT        | FINIAL        |
| EVERYONE     | GRIZZLED      |
| FEED         | HOME-BRED     |
| FRENCH       | INFINITIVE    |
| LET          | JUDICIOUS     |
| LOOKING      | NEBULA        |
| MOVING       | OVERBLOWN     |
| NATURAL      | PARTAKING     |
| PREVIOUS     | PRAYERFUL     |
| SERVE        | SHIFTLESS     |
| SPENT        | STEELY        |
| THINKING     | UNSAID        |
| BAGPIPE      | ACROSS        |
| BELFRY       | ALLOWED       |
| BRACELET     | ANALYSIS      |
| CLARINET     | ANYTHING      |
| EARTHWORM    | BRITISH       |
| EWE          | CHOICE        |
| FOWL         | CLOSED        |
| GIG          | DEMAND        |
| GULLET       | ENERGY        |
| HADDOCK      | GIVEN         |
| HARE         | HAVING        |
| HORSEHAIR    | INTERNATIONAL |
| ICICLE       | ITSELF        |
| MINER        | LOT           |
| MOTH         | MARKED        |
| MUG          | MEDICAL       |
| PENICILLIN   | ORIGINAL      |
| SKATE        | POSSIBLE      |
| SLEET        | PRESS         |
| WAND         | SOMEONE       |
| BATTLE       | SON           |
| BILL         | SUPPORT       |
| BOOK         | THOUSAND      |
| CENT         | TOWARD        |
| CHILDREN     | UNITED        |

DINNER  
FATHER  
FILM  
GAS  
HALL  
HOME  
HOUSE  
ISLAND  
MACHINE  
MATERIAL  
MONEY  
OFFICE  
ROOM  
SECRETARY  
WATER

ACCORDION  
ASPARAGUS  
CAMEL  
CARROT  
CLOVE  
DOE  
HELMET  
HOCKEY  
INFIRMARY  
PARCEL  
PERCH  
PICKLE  
RASPBERRY  
SAP  
UMPIRE

Table B1

*Proportion of Attribution Chosen by Word Type, Task Type and Study Strength in Experiment 1 (SE in brackets)*

| Task Type      | Weak study       |           |           |           | Strong study     |           |           |           |
|----------------|------------------|-----------|-----------|-----------|------------------|-----------|-----------|-----------|
|                | Random<br>Chance | Intuition | Memory    | Rules     | Random<br>Chance | Intuition | Memory    | Rules     |
| Recognition    |                  |           |           |           |                  |           |           |           |
| Old            | .06 (.02)        | .17 (.04) | .67 (.05) | .10 (.05) | .10 (.05)        | .11 (.02) | .75 (.05) | .03 (.02) |
| NC             | .12 (.02)        | .38 (.04) | .43 (.05) | .07 (.02) | .11 (.02)        | .35 (.05) | .49 (.06) | .05 (.02) |
| NI             | .12 (.03)        | .39 (.05) | .41 (.06) | .07 (.02) | .11 (.02)        | .32 (.06) | .53 (.07) | .03 (.15) |
| Classification |                  |           |           |           |                  |           |           |           |
| Old            | .09 (.02)        | .14 (.02) | .60 (.06) | .17 (.05) | .04 (.01)        | .13 (.02) | .81 (.03) | .02 (.01) |
| NC             | .23 (.05)        | .35 (.04) | .27 (.07) | .15 (.03) | .30 (.06)        | .43 (.05) | .18 (.04) | .09 (.03) |
| NI             | .26 (.06)        | .34 (.04) | .25 (.06) | .14 (.03) | .27 (.06)        | .47 (.06) | .17 (.05) | .09 (.02) |

Table B2

*Proportion of Attribution Chosen by Word Type, Task Type and Study Strength in Experiment 2 (SE in brackets)*

| Task Type      | Weak study       |           |           |           | Strong study     |           |           |           |
|----------------|------------------|-----------|-----------|-----------|------------------|-----------|-----------|-----------|
|                | Random<br>Chance | Intuition | Memory    | Rules     | Random<br>Chance | Intuition | Memory    | Rules     |
| Recognition    |                  |           |           |           |                  |           |           |           |
| Old            | .19 (.03)        | .31 (.04) | .15 (.05) | .05 (.02) | .13 (.02)        | .22 (.03) | .57 (.05) | .07 (.03) |
| NC             | .28 (.05)        | .44 (.04) | .22 (.04) | .06 (.02) | .20 (.04)        | .34 (.05) | .39 (.07) | .06 (.02) |
| NI             | .25 (.04)        | .46 (.03) | .24 (.05) | .05 (.02) | .21 (.03)        | .38 (.06) | .36 (.08) | .05 (.02) |
| Classification |                  |           |           |           |                  |           |           |           |
| Old            | .17 (.04)        | .31 (.02) | .40 (.05) | .12 (.04) | .11 (.02)        | .21 (.04) | .55 (.06) | .12 (.03) |
| NC             | .31 (.05)        | .38 (.03) | .15 (.03) | .16 (.04) | .26 (.05)        | .38 (.04) | .21 (.04) | .14 (.03) |
| NI             | .30 (.05)        | .36 (.04) | .21 (.05) | .13 (.03) | .22 (.05)        | .39 (.04) | .25 (.05) | .15 (.03) |

Table B3

*Proportion of Attribution Chosen by Word Type, Task Type and Study Strength in Experiment 3 (SE in brackets)*

| Task Type      | Weak study       |           |           |           | Strong study     |           |           |           |
|----------------|------------------|-----------|-----------|-----------|------------------|-----------|-----------|-----------|
|                | Random<br>Chance | Intuition | Memory    | Rules     | Random<br>Chance | Intuition | Memory    | Rules     |
| Recognition    |                  |           |           |           |                  |           |           |           |
| Old            | .19 (.04)        | .37 (.04) | .38 (.04) | .06 (.02) | .11 (.03)        | .15 (.03) | .68 (.04) | .06 (.01) |
| NC             | .27 (.04)        | .47 (.04) | .20 (.04) | .06 (.02) | .18 (.04)        | .31 (.07) | .44 (.06) | .06 (.02) |
| NI             | .25 (.05)        | .44 (.04) | .24 (.05) | .06 (.02) | .17 (.03)        | .31 (.07) | .43 (.07) | .08 (.02) |
| Classification |                  |           |           |           |                  |           |           |           |
| Old            | .18 (.04)        | .26 (.04) | .39 (.05) | .17 (.04) | .09 (.04)        | .20 (.05) | .64 (.07) | .06 (.02) |
| NC             | .23 (.03)        | .37 (.04) | .18 (.03) | .23 (.06) | .25 (.05)        | .36 (.03) | .20 (.05) | .19 (.04) |
| NI             | .26 (.04)        | .37 (.04) | .16 (.03) | .22 (.06) | .23 (.04)        | .41 (.03) | .19 (.05) | .17 (.04) |
